# Supplementary material for: Implementation of a Multidisciplinary Cancer Center Clinical Oncology and Research Symposium for Medical Students, Residents, Fellows and Faculty
Source: Research Square preprint supplement (doi:10.21203/rs.3.rs-6081991/v1), 2025-05-08

# 2nd Annual MCW Cancer Center's Careers in Clinical Oncology and Research Symposium - Staff

Please fill out this form for feedback on the symposium!!!

## 1. Role

- ☐ Resident/Fellow
- ☐ "Multi disciplinary team" member
- ☐ Lunch Time Faculty Mentor
- ☐ Administrator
- ☐ "From the Bench to Bedside" Lecturer
- ☐ "EDIB" Lecturer

## 2. What did you get out of this event? (Did you get what you had hoped out of this event?)

3. What did you think the "overview lecture of disciplines" lectures?

4. Next year should we:

- ☐ Keep the same/very similar lectures/format
- ☐ Scrap/replace these lectures
- ☐ Change these lectures

5. How should we change these lectures for next year?

6. What did you think of "From bench to bedside: Careers in oncology lecture"?

7. Next year should we:

- ☐ Have a more clinically focused researcher return
- ☐ Have another basic science/translational researcher return
- ☐ More time for Q&A
- ☐ Scrap the lecture portion altogether

8. How should we change the lecture and/or Q&A section for next year?

9. What did you think of "Multi disciplinary teams" lectures?

10. Next year should we:

- ☐ Have the same speaker/disciplines return
- ☐ Change/scrap/add disciplines

11. How should we change this lecture series section for next year?

12. What did you think of "Equity, Diversity, Inclusion and Belonging (EDIB): Cancer Prevention Research with Underrepresented Communities" lecture?

13. Next year should we:

- ☐ Have the same speaker/disciplines return
- ☐ Have a different community leader speak
- ☐ Scrap/change the format of this portion

14. How should we change this section for next year?

15. What did you think of "Interactive, Hands-on Learning Cases"?

16. Cases were: (choose multiple if appropriate)

- ☐ Too long
- ☐ Too short
- ☐ Too many
- ☐ Too few
- ☐ Should include other specialties/disciplines/cancer sites next year
- ☐ Should re-use same or similar cases
- ☐ Should take out cases all together
- ☐ Replace cases with more focus on hands on
- ☐ Replace hands on with more focus on cases

17. How should we change this section for next year

18. What did you think of "Lunch, Networking, Mentorship and Research"?

## 19. During the lunch period:

- ☐ I was able to connect with interested students
- ☐ I met a student that intended to follow up for research
- ☐ I met a mentor that intended to follow up for mentorship
- ☐ I was not able to meet with many/any interested students
- ☐ I felt this section was a waste of time

## 20. How can we improve the lunch period networking, mentorship, and research?

## 21. Overall the symposium: (multiple answers okay)

- ☐ Too long
- ☐ Too short
- ☐ Should be on a saturday
- ☐ Should be during the week (and made much shorter)

22. How can we better market/assure attendance for the conference, for faculty and students?

23. How would you rate the symposium overall?

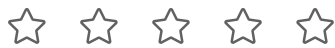

24. Additional feedback: Please let me know how we can improve this next year! What things to keep or change or scrap

---

This content is neither created nor endorsed by Microsoft. The data you submit will be sent to the form owner.

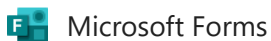

Supplement: Supplementary file 3 [file c031d9174f8359cdef7a41c3.pdf]
