# Supplementary material for: Implementation of a Multidisciplinary Cancer Center Clinical Oncology and Research Symposium for Medical Students, Residents, Fellows and Faculty
Source: Research Square preprint supplement (doi:10.21203/rs.3.rs-6081991/v1), 2025-05-08
Supplement: Supplementary file 1 [file 0e47a96dd1f2fd15ce794478.pdf]

Interactive, Hands-on  
Learning Cases

# CERVICAL CANCER

Led by  
Gynecologic Oncology  
Radiation Oncology  
Psycho-oncology

# WELCOME

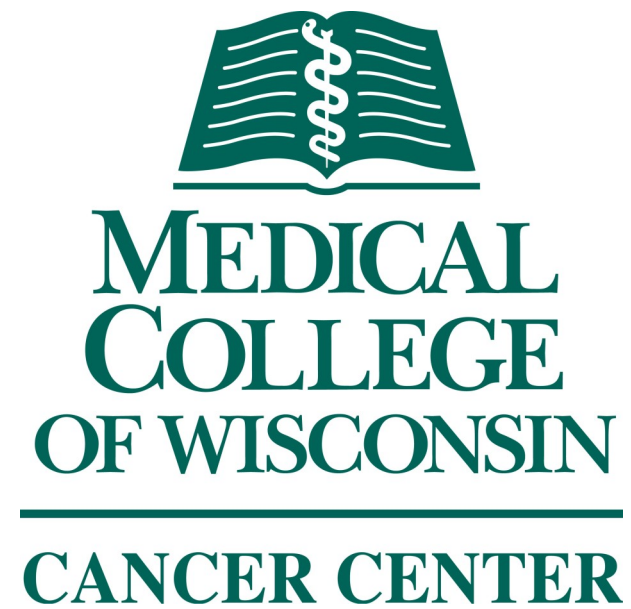

## Wi-Fi Access

Username: wifiguest  
Password: community

# 1ST ANNUAL EXPLORING HEALTH SCIENCE CAREERS IN ONCOLOGY SYMPOSIUM

**Medical College of Wisconsin  
Cancer Center**

**Saturday, September 24, 2022**



Interactive, Hands-on  
Learning Cases

# PANCREATIC CANCER

Led by  
Medical Oncology  
Surgical Oncology  
Palliative

# WELCOME



## Wi-Fi Access

Username: wifiguest  
Password: community

# 1ST ANNUAL EXPLORING HEALTH SCIENCE CAREERS IN ONCOLOGY SYMPOSIUM

**Medical College of Wisconsin  
Cancer Center**

**Saturday, September 24, 2022**



Interactive, Hands-on  
Learning Cases

# PEDIATRIC CANCER

Led by  
Pediatric Hematology/  
Oncology  
Genetics  
Clinical Trials

# WELCOME



## Wi-Fi Access

Username: wifiguest  
Password: community

# 1ST ANNUAL EXPLORING HEALTH SCIENCE CAREERS IN ONCOLOGY SYMPOSIUM

**Medical College of Wisconsin  
Cancer Center**

**Saturday, September 24, 2022**
