# Supplementary material for: Implementation of a Multidisciplinary Cancer Center Clinical Oncology and Research Symposium for Medical Students, Residents, Fellows and Faculty
Source: Research Square preprint supplement (doi:10.21203/rs.3.rs-6081991/v1), 2025-05-08
Supplement: Supplementary file 2 [file 02da4a3de72a4facec281cde.xlsx]

## Sheet: Registrants
Registration	Attended	Speaker	Last	First	MCW email	Dietary preference	Year	What do you hope to get out of this event?	Any additional questions or comments?
Yes	Yes					N/A	M2	Gain exposure to the different fields within oncology and network.
Yes						Vegetarian	M2	Learn more about cancer/diagnosing and the patient experience
Maybe						NA	M1	Networking and learning more about oncology
Yes	cancelled 9/20					Vegetarian (no nuts, no sesame seeds)	M1	Meeting faculty in oncologic specialities and getting a better idea of the field
Yes							M1	I hope to gain exposure to oncology and learn more about what being an oncologist is like in practice.
Yes	Yes	speaker
Yes	Yes						M2	Deep dive into oncology as a career
Yes	Yes					Prefer no cheese	M2	learn more about different oncologic specialties and the career path
Maybe							M1
Yes							M2	Network & learn of the field
Yes	Yes	speaker
Yes	Yes	speaker
Yes							M1	To learn more about subspecialties in oncology
Yes	Yes	speaker
Maybe	Yes					N/A	M1	Networking, getting a better idea of working in oncology/cases you will work on, potentially research opportunities
Yes	recorded	speaker
Maybe							M4	Learning more about different paths in oncology and networking
Yes						None	M1	Learn more about possible specialties
Yes							M1	explore oncology careers
Yes	Yes	speaker
No	Yes
Yes	Yes						M1	Learn more about options in oncology including how research plays into practice and hopefully form relationships with onoclogists
Yes	Yes					No	M2	I am hoping to network with medical oncologists and gain additional mentorship and research opportunities.
Yes						No	M2	Networking for possible research opportunities.
Yes	Yes					Open	M2	Learning about how different oncology specialties collaborate
Yes						No		Clarification of the specialty, better idea of MCW cancer research
Yes	cancelled 9/23					Vegetarian	M2	A better understanding of whether or not I want to pursue a career in oncology and what that career might look like if I do.
Yes						no pork	M3
Yes						None	M1	Just hoping to learn more about oncology and the multidisciplinary approach to cancer treatment!
Yes	Yes					no	M1	Research opportunities
Yes	Yes					No	M3	Learn more about career opportunities, network
Yes	Yes					No	M3
Maybe							M1	Learn more about oncology, network, and find shadowing opportunities
Yes	Yes					No	M1	Look for research opportunities and also gain insight into a career in oncology.
Yes	Yes	speaker
Yes	Yes	speaker
No	Yes
Yes						n/a	M3	Networking
Yes	Yes	speaker
Yes	Yes					cashews and pistachios	M3	I would like to learn more about the different careers within oncology and how to set myself up to possibly pursue a path in oncology by maximizing and prioritizing time/experiences/rotations throughout the rest of medical school
Maybe						none	M2	Networking opportunities, explore different areas of oncology, new research ideas
Yes	Yes	speaker
Yes						Halal	M1	Learn more about Hematology and Oncology at MCW, Networking
Maybe							M2	Get a sight into what a field in oncology could bring; explore career interests
Maybe						vegetarian	M2	networking with physicians, learning about oncology sub-specialties
Yes	Yes					Allergies to nuts and shellfish	M3	Greater understanding of careers in oncology, opportunities for networking and research
Yes	Yes	speaker
Yes						No	M2	More info on pursuing a career in oncology
Yes						vegetrian	M3
Yes	Yes					No	M2	Hoping to hear more about head and neck oncology.
Yes	Yes					gluten free	M2
Yes	Yes	speaker
Yes	Yes					n/a	M3	Learn more about oncology	Will try to attend as much as possible - schedule depending
Yes	Yes	speaker
Yes						No	M1	understanding of the oncology specialty and how it fits into other specialties' work in a big picture type view.
Yes	Yes	speaker
Yes							M3	Explore oncology and research opportunities
Yes	Yes					no	n/a	n/a
Maybe						N/A	M3	Information about applying for a IM -> heme/onc fellowship, connections with current residents/fellows. I'm not sure if I'll be able to attend the event due to my rotations schedule but I'll hopefully be able to attend a part of it.	N/A
Yes	Yes					n/a	M2	Networking, learning about oncology-related careers, research opportunity, free food (because my budget is tight :P)	Need to be away from the event to go to APAMSA Neighborhood House from 11am-2pm
49	33	Yes
