# Supplementary material for: Implementation of a Multidisciplinary Cancer Center Clinical Oncology and Research Symposium for Medical Students, Residents, Fellows and Faculty
Source: Research Square preprint supplement (doi:10.21203/rs.3.rs-6081991/v1), 2025-05-08
Supplement: Supplementary file 2 [file 4431c4ff5fb37b7dbd94652d.pdf]

# 2nd Annual MCW Cancer Center's Careers in Clinical Oncology and Research Symposium

Please fill out this form for feedback on the symposium!!!

## 1. Year in medical school

- ☐ M1
- ☐ M2
- ☐ M3
- ☐ M4
- ☐ Undergraduate/PostBacc/Premed
- ☐ Resident/Fellow
- ☐ Graduate Student
- ☐ Other

2. What did you get out of this event? (Did you get what you had hoped out of this event?)

3. How likely are you to pursue a career in oncology?

1 – Very unlikely, 2 – Somewhat unlikely, 3 – Unsure, 4 – Somewhat likely, 5 – Very likely

|   |   |   |   |   |
|---|---|---|---|---|
| 1 | 2 | 3 | 4 | 5 |
|---|---|---|---|---|

4. How much do you feel you know about various fields in oncology?

1 – None, 2 – Below Average, 3 – Average, 4 – Above Average, 5 – A Lot

|   |   |   |   |   |
|---|---|---|---|---|
| 1 | 2 | 3 | 4 | 5 |
|---|---|---|---|---|

5. What did you think the "overview lecture of disciplines" lectures?

6. Next year should we:

- ☐ Keep the same/very similar lectures/format
- ☐ Scrap/replace these lectures
- ☐ Change these lectures

7. How should we change these lectures for next year?

8. What did you think of "From bench to bedside: Careers in oncology lecture"?

9. Next year should we:

- ☐ Have a more clinically focused researcher return
- ☐ Have another basic science/translational researcher return
- ☐ More time for Q&A
- ☐ Scrap the lecture portion altogether

10. How should we change the lecture and/or Q&A section for next year?

11. What did you think of "Multi disciplinary teams" lectures?

12. Next year should we:

- ☐ Have the same speaker/disciplines return
- ☐ Change/scrap/add disciplines

13. How should we change this lecture series section for next year?

14. What did you think of "  
Equity, Diversity, Inclusion and Belonging (EDIB): Cancer Prevention  
Research with Underrepresented Communities" lecture?

15. Next year should we:

- ☐ Have the same speaker/disciplines return
- ☐ Have a different community leader speak
- ☐ Scrap/change the format of this portion

16. How should we change this section for next year?

17. What did you think of "Interactive, Hands-on Learning Cases"?

18. Cases were: (choose multiple if appropriate)

- ☐ Too long
- ☐ Too short
- ☐ Too many
- ☐ Too few
- ☐ Should include other specialties/disciplines/cancer sites next year
- ☐ Should re-use same or similar cases
- ☐ Should take out cases all together
- ☐ Replace cases with more focus on hands on
- ☐ Replace hands on with more focus on cases

19. How should we change this section for next year

20. What did you think of "Lunch, Networking, Mentorship and Research"?

## 21. During the lunch period:

- ☐ I was able to connect with faculty of interest
- ☐ I met a mentor that I might pursue research with
- ☐ I met a mentor that I might continue mentorship with
- ☐ I was exposed to new and interesting ideas
- ☐ I have new opportunities available after meeting with mentors
- ☐ I was not able to meet with a mentor
- ☐ I felt this section was a waste of time

## 22. How can we improve the lunch period networking, mentorship, and research?

## 23. Overall the symposium: (multiple answers okay)

- ☐ Too long
- ☐ Too short
- ☐ Should be on a saturday
- ☐ Should be during the week (and made much shorter)

24. How can we better market/assure attendance and staying to the end of conference

25. If you stayed until the end of the cases, what made you stay?

- ☐ Hands on Activities
- ☐ Case based learning
- ☐ Opportunity to connect with residents
- ☐ Why would I leave early?

26. If you did not stay until the end of the cases, why did you leave?

- ☐ We had an exam on Monday
- ☐ The cases did not seem interesting to me
- ☐ The symposium was too long
- ☐ I had other commitments and had to leave early

27. Additional comments on why you stayed or left early?



28. How would you rate the symposium overall?

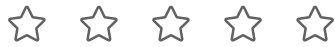

29. Additional feedback: Please let me know how we can improve this next year!!What things to keep or change or scrap

---

This content is neither created nor endorsed by Microsoft. The data you submit will be sent to the form owner.

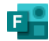

Microsoft Forms
