# Supplementary material for: Implementation of a Multidisciplinary Cancer Center Clinical Oncology and Research Symposium for Medical Students, Residents, Fellows and Faculty
Source: Research Square preprint supplement (doi:10.21203/rs.3.rs-6081991/v1), 2025-05-08
Supplement: Supplementary file 3 [file 0c37fe837fb852c96c61cd74.docx]

You are invited to (UNIVERSITY)’s Cancer Center’s Careers in Clinical Oncology and Cancer Research Symposium on (DAY) September (NUMBER) in the (ROOM) at the (LOCATION). This (NUMBER) annual event creates a space for medical students to engage in hands-on learning through interactive case workshops, networking and mentorship opportunities, and exploring the breadth of oncologic clinical practice and research. Attendees will also have an opportunity to connect with residents and faculty who will share insights and experiences working in clinical oncology and cancer research. Breakfast and lunch will be provided.

Let us know if you will attend by registering here (required):

(LINK)

See the attached agenda for details. Email (LEADER 1 NAME AND EMAIL) or (LEADER 2 NAME AND EMAIL) with any questions.

We look forward to meeting you in September!
