# Supplementary material for: Implementation of a Multidisciplinary Cancer Center Clinical Oncology and Research Symposium for Medical Students, Residents, Fellows and Faculty
Source: Research Square preprint supplement (doi:10.21203/rs.3.rs-6081991/v1), 2025-05-08
Supplement: Supplementary file 4 [file 11a4e691ff084b32ee28d490.docx]

Hello everyone!

Thank you so very much for your help throughout the planning process and at the symposium! We could not have done it without you. I will send out your contact information as well as the compiled pdf slides for their reference.

Please also either fill out the below form (to prompt thoughts/ ideas) or email me in response for feedback! I want to continually improve the conference, both in terms of student experience, our experience, and ease of planning.

(LINK)

Thank you everyone!
