# Supplementary material for: Implementation of a Multidisciplinary Cancer Center Clinical Oncology and Research Symposium for Medical Students, Residents, Fellows and Faculty
Source: Research Square preprint supplement (doi:10.21203/rs.3.rs-6081991/v1), 2025-05-08
Supplement: Supplementary file 4 [file d5dc90ff699e4c94c853b991.pdf]

Tools ▾

Saved Sep 20, 2023 at 1:56 PM

Published

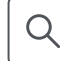

Preview

Publish

## MCW Cancer Center's Careers in Clinical Oncology and Cancer Research Symposium Registration

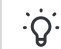

ExpertReview score

Fair

▼ Default Question Block

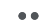

Q1

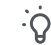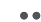

Last Name

Q2

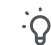

First Name

Q3

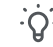

Credentials (PhD, MD, etc.)

Q10

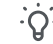

Institution

Q4

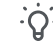

Education Level

Q5

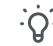

MCW Email (or primary email for those outside MCW)

Q6

## Dietary Restrictions

- ☐ Gluten Free
- ☐ Vegetarian
- ☐ Other (please specify)

Q7

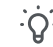

What do you hope to get out of this event?

Q9

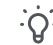

Specific area(s) of interest in clinical oncology or cancer research

Q8



Any additional questions or comments?

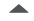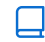[Import from library](#)[Add new question](#)[Add Block](#)

End of Survey

We thank you for your time spent taking this survey.

Your response has been recorded.
