# Supplementary material for: Implementation of a Multidisciplinary Cancer Center Clinical Oncology and Research Symposium for Medical Students, Residents, Fellows and Faculty
Source: Research Square preprint supplement (doi:10.21203/rs.3.rs-6081991/v1), 2025-05-08
Supplement: Supplementary file 5 [file 12186717b871acb776132bd5.docx]

Residents/fellows and faculty working in clinical oncology and/or cancer research, please join us for the (UNIVERSITY)’s Cancer Center’s *Careers in Clinical Oncology and Cancer Research* on September (DATE) from (TIME) in the (ROOM). Come and meet with students interested in mentoring and research in oncologic specialties. Lunch will be provided.

Let us know if you can attend by registering here:

(LINK)

Your attendance is only required during the lunch period. See the attached agenda for full details. Feel free to attend any or all additional sessions if interested. Email (LEADER 1 NAME AND EMAIL) or (LEADER 2 NAME AND EMAIL) with any questions.

We look forward to working with you in September!
