# Supplementary material for: Implementation of a Multidisciplinary Cancer Center Clinical Oncology and Research Symposium for Medical Students, Residents, Fellows and Faculty
Source: Research Square preprint supplement (doi:10.21203/rs.3.rs-6081991/v1), 2025-05-08
Supplement: Supplementary file 5 [file f9b4033c3684cd0077a723ee.pdf]

Medical College of Wisconsin presents

# Careers in Clinical Oncology and Cancer Research Symposium

MCW CANCER CENTER

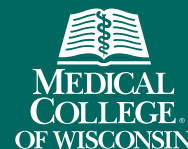

## JOIN US!

Saturday, September 30 | 8:30AM - 4:00PM

Registration required (registration closes 9/20!)

[https://mcwisc.co1.qualtrics.com/jfe/form/SV\\_d a530vXdMiAs5HE](https://mcwisc.co1.qualtrics.com/jfe/form/SV_d a530vXdMiAs5HE)

*You are invited to MCW Cancer Center's Careers in Clinical Oncology and Cancer Research Symposium on Saturday, September 30 in the Alumni Center at the Medical Education Building at the Medical College of Wisconsin, 8701 Watertown Plank Road, Milwaukee, WI. This second annual event creates a space for medical students to engage in hands-on learning through interactive case workshops, networking and mentorship opportunities, and exploring the breadth of oncologic clinical practice and research. Attendees will also have an opportunity to connect with MCW residents and faculty who will share insights and experiences working in clinical oncology and cancer research. Breakfast and lunch will be provided.*

Register here (pre-registration is required):

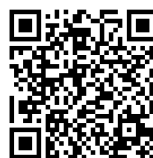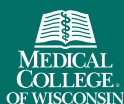

knowledge changing life

Email Michele Ward at [mward@mcw.edu](mailto:mward@mcw.edu) or AJ Schottstaedt at [aschottstaedt@mcw.edu](mailto:aschottstaedt@mcw.edu) with any questions.
