# Supplementary material for: Implementation of a Multidisciplinary Cancer Center Clinical Oncology and Research Symposium for Medical Students, Residents, Fellows and Faculty
Source: Research Square preprint supplement (doi:10.21203/rs.3.rs-6081991/v1), 2025-05-08
Supplement: Supplementary file 6 [file 2729587e36c74b012db47228.xlsx]

## Sheet: Attendees
Attend?	Faculty/ Leaders	Last Name	First Name	Credentials	Institution	Education Level	Email	Dietary Restrictions	Dietary Other	What do you hope to get out of this event?	Specific area(s) of interest in clinical oncology or cancer research	Any additional questions or comments?	Speaker
Y				BA	Medical College of Wisconsin	Bachelor's		Vegan		Learning more about oncology field, network with key people in the field	Pediatric
					Medical College of Wisconsin	BS				Learn more about the field.
				BS	Medical College of Wisconsin	M1				Learn more about oncology and careers in oncology	Pancreatic cancer, cancers affecting women
					Medical College of Wisconsin/Versiti	Some Grad School		Nut free		Novel insights in the different careers I can take coming with a background in cancer research.	Leukemia and other blood cancers, epigenetics
Y				MS	Medical College of Wisconsin	Masters				New Cancer research approaches	Role of Gut complement components in Colon cancer
Y					Medical College of Wisconsin	Medical Student				Learn more about research and careers in oncology	Head and Neck cancer
					Medical College of Wisconsin	M2				To learn more about careers in oncology and cancer research as a physician.
					Medical College of Wisconsin	MD/PhD Candidate		Pescetarian		Understand subspecialties in oncology and how clinical trials work	cancer tumor formation and cellular crosstalk
Y	Yes			MD, MPH	Medical College of Wisconsin	Doctorate				Contributing to future generations of oncology specialists	Surgical oncology, pancreatic cancer
				MPH	Medical College of Wisconsin	MPH
				MBBS, MD	Versiti Blood Research Institute	MD		Gluten Free
					Medical College of Wisconsin	M1		Gluten Free		introduction to a career in clinical oncology, overview of cancer research opportunities at MCW, hands on skills if applicable	stem cell cancer research, day in the life of a clinical oncologist
				BA	Medical College of Wisconsin	MD/PhD Trainee					Neuro-Oncology
Y					Medical College of Wisconsin	M1				I want to learn if oncology is something I am interested in pursuing	Pediatric oncology
				BA		BA				I hope to learn about different careers opportunities in oncology.	Radiation oncology
					Medical College of Wisconsin	BS				Iâ€™m a first year medical student looking to see what research in the field is currently happening, especially at my institution. I would love to gain exposure to oncology and potential mentors.	I am interested in breast oncology mainly
Y					Medical College of Wisconsin	M1
Y	Yes			MD, FACS	Medical College of Wisconsin Assistant Professor of Surgical Oncology Program Director, Comprehensive Endocrine Surgery Fellowship Clerkship Director, Complex Surgical Oncology Fellowship, Endocrine Surgery Clerkship
Y	Yes			MD, MA	Medical College of Wisconsin	fellow				Share information about gynecologic oncology as a specialty.	Gynecologic oncology, cervical cancer, bioethics and medical humanities
					Medical College of Wisconsin	M2				I'm hoping to explore areas of oncology Iâ€™m unfamiliar with and to network with other oncologists.	Psycho-oncology, medical oncology
Y				BA	Medical College of Wisconsin	M2				I am looking forward to learning about the day in a life of many different oncology sub-specialties!	Head and Neck Rad Onc
Y	Yes				Medical College of Wisconsin							not registered
Y					Medical College of Wisconsin	M2		Gluten Free		I hope to get more information about people's experience becoming oncologists/their recommendations. I want to hear about pros/cons of what they're doing and the balance they have between clinical work and research.	I'm most interested in pediatric hematology/oncology, especially research involved with bone marrow transplantation.
					Medical College of Wisconsin	M2				I hope to be able to connect with more faculty and trainees working in oncology at MCW and to build some skills that will benefit me as a future oncology provider	Surgical oncology, radiation oncology, research improving outcomes and patient experience/quality of life
					Medical College of Wisconsin	M1				I am a first year medical student who is potentially interested in oncology, so I would just like to get a little exposure to the different specialties within the field and current research that is being performed. I also want to do research in oncology during my time at MCW, so learning about research opportunities would be awesome.
				MSTP student	Medical College of Wisconsin	Graduate				Insights into translational oncology and specialties within oncology	Radiation oncology, protein structure/function as it pertains to oncology
Y	Yes			MS	Medical College of Wisconsin	Graduate - MS
Y				BS	Medical College of Wisconsin	MS3					Medical Oncology
Y	Yes			PhD	Medical College of Wisconsin Associate Professor, Radiation Oncology	PhD
Y					Medical College of Wisconsin	Medical School		peanut allergy		confirm interest for oncology and gain network	precision oncology
				PhD	University of Chicago - Pritzker School of Medicine	PhD				Understand what my options are for being a physician-scientist with cancer Potential opportunities for sub-Is in other places during my 4th year	Cellular immunotherapy Cell-free DNA for cancer diagnostics
Y				MS	Medical College of Wisconsin	M1				I hope to learn more about oncology and the potential innovations/needs in the field.	Potentially interested in pediatric oncology or cardio oncology.
Y	yes			MD, MPH	Medical College of Wisconsin Assistant Professor, Surgical Oncology
					Medical College of Wisconsin	M3				an opportunity to learn about oncology specialities and hopefully network	gyncology oncology or radiation oncology
Y					Medical College of Wisconsin
Y				PhD	Medical College of Wisconsin	M3				I am hoping to get a better understanding of what the different disciplines of oncology entail and the training paths needed to have a career in them. I am also interested in learning more about ways to have a career combining clinical oncology practice with basic science research as a physician scientist.	Pediatric oncology, adult hematology and medical oncology, gynecologic oncology, basic science research (biochemistry + biophysics)
Y	Yes			PhD, MPH	Medical College of Wisconsin Associate Professor, Radiation Oncology	PhD		Vegetarian		Interaction and discussion with students/trainees (participating as a presenter)
Y					Medical College of Wisconsin	Bachelor of Science				Understanding the different clinical fields in oncology and their roles in cancer treatment.	Immunotherapy
Y				MD	Medical College of Wisconsin
Y					Medical College of Wisconsin	Medical Student				I hope to gain a better understanding for different careers in oncology as well as network with some oncologists!	Radiation Oncology Medical Oncology Psych-Oncology Neuro-Oncology
Y					Medical College of Wisconsin	Medical student				I hope to gain a better understanding of the specialty of oncology.	Pediatric oncology.
Y					Medical College of Wisconsin	M1				I hope to learning more about oncology and current translational research on cancer.	N/A
					Medical College of Wisconsin	Undergraduate				I hope to gain insight about what a career in clinical oncology might look like and learn from upper-level students what would be required to pursue such a career.	head and neck cancer
					Medical College of Wisconsin	M4 Medical Student		Nut allergy		Career exploration and networking	Skin cancers, blood cancers, breast and gyn cancers
	yes			PhD	Medical College of Wisconsin Assistant Professor, Institute for Health & Equity
Y					Medical College of Wisconsin	MD/PhD Candidate				learn more about cancer and the careers surrounding it	anything neuro related such as neurofibratomas
Y	Yes			MD	Medical College of Wisconsin	Fellow				Opportunity to share about my field	Pediatric Heme/Onc Ethics
					Medical College of Wisconsin - Green Bay	M3
					Medical College of Wisconsin	Bachelors degree				Learn more about the field of oncology	Translational research Bioinformatics
Y	yes			MD	Medical College of Wisconsin Department of Radiation Oncology
Y					Medical College of Wisconsin	Medical Student				Learn more about cancer research and network with oncologists	radiation oncology
					Medical College of Wisconsin	M2				Connection with mentors and understanding of how to work in a fast-changing oncology environment.	Not sure yet
				MS	Medical College of Wisconsin					I want to learn a lot more about gynecological oncology and the different components that are involved in supporting patients. I also want to connect with new people.	Gynecological oncology
				MD	Medical College of Wisconsin	Medical Student		Vegetarian		Networking and Mentorship	Head and Neck Oncology/Surgery
	yes			MD	Medical College of Wisconsin Professor, Medicine Chief, Division of Hematology and Oncology
Y					Medical College of Wisconsin	M1				I hope to further explore the field of oncology and network with fellow students and faculty who share my interest in oncology.	Bone marrow transplant, cancer immunotherapy, hereditary cancers
Y				RN	Medical College of Wisconsin	Bachelors Science in Nursing				Explore careers in oncology.
Y				MS	Medical College of Wisconsin	M3		Vegetarian
					Medical College of Wisconsin	M2
				PhD	Medical College of Wisconsin	PhD				I hope to get better understanding of current and future direction of research in clinical oncology.	Mutation driven mechanism purturbation in cancer.
Y					Medical College of Wisconsin	Bachelor of Science				Be able to learn more about clinical oncology and the training necessary to pursue oncology; meet medical oncology professionals and learn from them
				MD, MS	Medical College of Wisconsin	PhD student				I intend to gain better insight into the interface of Biomedical and Clinical Research in cancer care and Therapy	Gynecological oncology and Breast cancer research	I am looking forward to an exciting meeting.
Y					Medical College of Wisconsin	M1				I hope to learn more about what a career in clinical oncology looks like and gauge whether I am interested!	undecided! potentially surgical or pediatric oncology
					Medical College of Wisconsin	Masters				I want to understand what the field of oncology actually entails.	I do not have any specific areas of interest currently. I am here to learn.
Y	Yes			MBA	Medical College of Wisconsin	MBA
						Undergraduate (Premed)				I hope to get exposure, awareness, and connections out of this event.	Specific areas of interest in clinical oncology and cancer research lands in healthcare disparities for minorities.	N/A
				MD	Universidad Autonoma de Guadalajara	Recent graduate				I hope to expand my knowledge of cultural competency in medicine and the elimination of health disparities in underrepresented communities.	Cervical cancer screening, prevention, and treatment in underrepresented patient populations.	Looking forward to hearing Dr. Lisa Sanchez-Johnsen's presentation!
				BA	Roosevelt University					I hope to gain greater insight into health disparities; I hope to gain a network in medicine.	- breast cancer - bone cancer - cervical cancer	I am excited! Thank you Dr. Lisa Sanchez-Johnsen for inviting me!
Y				BA	Medical College of Wisconsin	BA		Vegetarian
Y	yes			MD	Medical College of Wisconsin Professor and Chair, Obstetrics & Gynecology
				BA	Medical College of Wisconsin	BA in Science		No dairy			Heme oncology and gynecological oncology
Y	yes			PhD	Medical College of Wisconsin Professor, Institute for Health and Equity Cancer Center Associate Director of EDIB					Sharing research and opportunities to engage in research with learners at all levels and faculty.	Cancer health equity, cancer prevention and cancer risk reduction. Obesity and smoking in Latinos, Asians, Pacific Islanders, African Americans, and Indigenous communities. Diversity and inclusion in cancer research
Y	Yes			MD	Medical College of Wisconsin	PGY4 (resident)					Radiation Oncology
Y				BA	Medical College of Wisconsin	BA					bmt, sdoh, neuro oncology
					Medical College of Wisconsin	PhD Candidate					Image guided diagnostic and therapy
					Medical College of Wisconsin	BS		Vegetarian			global causes
				BS	University of Chicago Pritzker School of Medicine					I'd just like to know more about the different options available to me in the future! I'm aiming to specialize in hematology/oncology, but I haven't yet decided how I'd like to spend my time as a clinician in academia.	Cancer immunology, improving side effect management for cancer patients
				BS	Medical College of Wisconsin	BS (college)		no beef or pork		to learn more about oncology	Surgical or medical oncology
					UWSMPH	M2				Network with other medical students and learn more about oncology as a whole.	Advancing oncology screenings
Y	Yes			MD	Medical College of Wisconsin	fellow		Vegetarian		student engagement	gyn onc		yes
Y					Medical College of Wisconsin	M2
					Medical College of Wisconsin - Green Bay	M1						is there a zoom option for regional campuses? thanks!
					Medical College of Wisconsin	M1 Medical Student				I would love to integrate myself into the oncology and immunology community on our campus and start to explore the field so I can find what Iâ€™m most passionate about within oncology.	Immunotherapy and pediatric oncology
Y					Medical College of Wisconsin	M1				I hope to connect with and learn from established oncologists in varying subspecialties of the field.	Iâ€™m interested in hearing about radiation oncology.
Y	yes			PsyD, ABPP	Medical College of Wisconsin Associate Professor, Psychiatry & Behavioral Medicine							not registered
Y					Medical College of Wisconsin
					Medical College of Wisconsin	M2				To learn more about the opportunities in, path to, and daily life of an oncologist	NA
Y				BS	Medical College of Wisconsin	M2				Learn more about career options in oncology.	Drug/treatment side effects
				CRC	Medical College of Wisconsin	Master					Clinical research
					Medical College of Wisconsin	Medical Student				To learn more about different careers ion Oncology	I'm not too sure. But I am looking forward to exploring different aspects of it at this symposium
				PhD	Medical College of Wisconsin	PhD					Deep learning and image processing techniques
Y					Medical College of Wisconsin	MD/PhD student				Better understanding of clinical skills relating to cancer care, and trial design	Trial design
47
