# Supplementary material for: Implementation of a Multidisciplinary Cancer Center Clinical Oncology and Research Symposium for Medical Students, Residents, Fellows and Faculty
Source: Research Square preprint supplement (doi:10.21203/rs.3.rs-6081991/v1), 2025-05-08
Supplement: Supplementary file 7 [file 59df9c133d37dea289943b74.docx]

Below is an outline of expectations for the conference! Powerpoints from last year are linked at the bottom, and the agenda is attached for reference! Reach out to (LEADER 1 NAME AND EMAIL) with any questions

Slides are due by (DATE) to (LEADER)

**Overview Lecture of Disciplines (Resident/Fellow Leaders)**

The intro will be very short. We have 55 minutes for 5 people to introduce their specialties, and will take a minute or two between each one. Shoot for ~8 minutes, and we'll save questions for the last ~10 minutes

**From Bench to Bedside: Careers in Oncology (NAMES OF RESEARCHERS GIVING THE TALK)**

You have 40 minutes total for your talk that you can divide however you feel appropriate. Consider 15 minutes each with ~10 min for questions. The goal of the session is to expose medical students to the range of oncologic research (bench, translational, clinical), the breadth of oncologic specialties and research, and to get students excited/interested in research.

My suggestion is to give a very brief intro of a day in the life, and what it means to be a basic science / translational researcher (this could be done by one or both of you), then discuss your research. If you are looking to recruit students, it might be nice to include relevant projects you are recruiting for at the end (we could display this during the Q&A session)!

**Multidisciplinary Teams Lecture (NAMES OF SPEAKERS)**

20 minutes across 3 people to briefly discuss a day in the life and how your specialty relates to oncology. Up to you all how best to do this, could have each person talk for 5-6 minutes

**Equity, Diversity, Inclusion and Belonging (EDIB): Cancer Prevention Research with Underrepresented Communities (NAME OF SPEAKER)**

25 minute time slot. Consider using a ~15-20 minute talk and leaving 5-10 minutes for questions. The goal is to introduce EDIB and its relation to cancer care to students. Consider giving a broad discussion of EDIB in oncology followed by research or community outreach experiences. We want to get students excited/interested in EDIB and research! If you are looking to recruit students, could end with relevant projects you are recruiting for that we can display during the Q&A period.

**Lunch, Networking, Mentoring and Research (All)**

Students will have opportunities to network and meet with oncology PIs, clinicians, and residents/fellows in different research roles to find mentors and potentially join/express interest in specific research projects. This will occur by having signs with names of the PIs/clinicians at different tables and their main research interests. Students can then go and talk to them in an informal setting

**Interactive Hands on Learning Cases (Resident Leaders and Multidiscplinary teams)**

Groupings (THESE ARE WHAT WE USED 2023 AS EXAMPLES AND SHOULD BE ADJUSTED EACH YEAR):

1. H&N with flexible laryngoscopy - Rad onc (NAME) and Med Onc (NAME)
2. Endometrial cancer with D&C & US - gyn onc (NAME) and psych onc (NAME)
3. GI Cancer with Suturing - Surg onc (NAME) and Genetics (NAME)
4. Peds Cancer with Trial Design - Peds onc (NAME) and Trials (NAME)

You work with another discipline (outlined above) to generate a case that showcases both disciplines. We have 3 hours total, with 4 disciplines, thus 4 stations with about 40 min at each station, and 5 minutes to rotate through. So you personally will give your station 4 times

The goal is to have a case the students can work through, e.g. present a patient, discuss work up and management, include ancillary services as relevant.

The hands on portion can be anything that you feel is relevant to your specialty, and will be fun and exciting for medical students!

I expect you to coordinate with the other discipline you are paired with to create a case. You can use powerpoint or simply talk through a case. The case will largely be dictated by the clinical resident(s)/fellow(s), as they will be leading that portion, but obviously needs to be something that is relevant to both specialties

Please try to make the cases different from last year!

Compiled Slide Deck from last year for reference

(LINK)
