# Supplementary material for: Implementation of a Multidisciplinary Cancer Center Clinical Oncology and Research Symposium for Medical Students, Residents, Fellows and Faculty
Source: Research Square preprint supplement (doi:10.21203/rs.3.rs-6081991/v1), 2025-05-08
Supplement: Supplementary file 8 [file 7fc2b0e5f09c1a5e2fb466e9.xlsx]

## Sheet: 2nd Symposium
Category	List Serve Group	Email
Resident/Fellow/Staff Recruitment
	Rad onc residents
	Med onc fellows
	Gyn onc fellows
	Peds onc fellows
	Surg onc fellows
	Rad onc department
	Med onc department
	Gyn onc department
	Peds onc department
	Surg onc department
	Onc faculty
	Research Lab Faculty
Student groups
	Oncology Interest Group
	American Medical Association
	Student Physician Networking Program
	Student National Medical Association
	OB/GYN Interest Group
	Pediatric Student Association
	Student Surgical Society
	MSTP Student List
External
	University of ______ Oncology Interest Group
	University of ______ Oncology Interest Group
	University of ______ Oncology Interest Group
	University of ______ Oncology Interest Group
