# Supplementary material for: Implementation of a Multidisciplinary Cancer Center Clinical Oncology and Research Symposium for Medical Students, Residents, Fellows and Faculty
Source: Research Square preprint supplement (doi:10.21203/rs.3.rs-6081991/v1), 2025-05-08
Supplement: Supplementary file 10 [file a78f9a95f9bd075c404d3f85.xlsx]

## Sheet: Sheet1
Id	Start time	Completion time	Email	Name	Total points	Quiz feedback	Grade posted time	Year in medical school	Points - Year in medical school	Feedback - Year in medical school	What did you get out of this event? (Did you get what you had hoped out of this event?)	Points - What did you get out of this event? (Did you get what you had hoped out of this event?)	Feedback - What did you get out of this event? (Did you get what you had hoped out of this event?)	How likely are you to pursue a career in oncology? 1 – Very unlikely, 2 – Somewhat unlikely, 3 – Unsure, 4 – Somewhat likely, 5 – Very likely	Points - How likely are you to pursue a career in oncology? 1 – Very unlikely, 2 – Somewhat unlikely, 3 – Unsure, 4 – Somewhat likely, 5 – Very likely	Feedback - How likely are you to pursue a career in oncology? 1 – Very unlikely, 2 – Somewhat unlikely, 3 – Unsure, 4 – Somewhat likely, 5 – Very likely	How much do you feel you know about various fields in oncology? 1 – None, 2 – Below Average, 3 – Average, 4 – Above Average, 5 – A Lot	Points - How much do you feel you know about various fields in oncology? 1 – None, 2 – Below Average, 3 – Average, 4 – Above Average, 5 – A Lot	Feedback - How much do you feel you know about various fields in oncology? 1 – None, 2 – Below Average, 3 – Average, 4 – Above Average, 5 – A Lot	What did you think the "overview lecture of disciplines" lectures?	Points - What did you think the "overview lecture of disciplines" lectures?	Feedback - What did you think the "overview lecture of disciplines" lectures?	Next year should we:	Points - Next year should we:	Feedback - Next year should we:	How should we change these lectures for next year?	Points - How should we change these lectures for next year?	Feedback - How should we change these lectures for next year?	What did you think of "From bench to bedside: Careers in oncology lecture"?	Points - What did you think of "From bench to bedside: Careers in oncology lecture"?	Feedback - What did you think of "From bench to bedside: Careers in oncology lecture"?	Next year should we:	Points - Next year should we:	Feedback - Next year should we:	How should we change the lecture and/or Q&A section for next year?	Points - How should we change the lecture and/or Q&A section for next year?	Feedback - How should we change the lecture and/or Q&A section for next year?	What did you think of "Multi disciplinary teams" lectures?	Points - What did you think of "Multi disciplinary teams" lectures?	Feedback - What did you think of "Multi disciplinary teams" lectures?	Next year should we:1	Points - Next year should we:1	Feedback - Next year should we:1	How should we change this lecture series section for next year?	Points - How should we change this lecture series section for next year?	Feedback - How should we change this lecture series section for next year?	What did you think of " Equity, Diversity, Inclusion and Belonging (EDIB): Cancer Prevention Research with Underrepresented Communities" lecture?	Points - What did you think of " Equity, Diversity, Inclusion and Belonging (EDIB): Cancer Prevention Research with Underrepresented Communities" lecture?	Feedback - What did you think of " Equity, Diversity, Inclusion and Belonging (EDIB): Cancer Prevention Research with Underrepresented Communities" lecture?
1	2023-10-04 19:36:59	2023-10-04 19:54:09	anonymous					M3	0		I am currently on my community oncology rotation and had an amazing experience so far learning about different fields and careers centered around oncology and the collaborative nature of the careers in this field. One of the missing pieces from my experience is getting the opportunity to hear from residents about their experience and what residency training in each field looks like. I'd love addi…	0		4	0		4	0		I liked to see how each field addresses the patient experience and the collaboration that happens within all the fields and how a career in oncology can be approached from different disciplines.	0		Change these lectures	0		The intro slides were great at giving an overview but I wished that we could have residents at each table to have discussions and ask questions. As an introvert, it's hard for me/slightly intimidating to approach a table of residents and ask questions.	0		Great overview that encompasses the field of practice. Would like to see what "curriculum", so to speak, or training that each specialty undergoes in each residency at MCW. For example what topics do you learn- such as radiation oncology. Should individuals who historically weren't strong in their understanding in physics still consider pursuing that field, etc	0		More time for Q&A ;	0		I think having more representatives from each to share their unique stories to how they reached the decision to pursue their specialty and at tables to answer student questions	0		I really enjoyed it	0		Change/scrap/add disciplines	0		Not necessarily have the same speakers but getting to know the the residency directors, how they imagine the future of that field will look at and what MCW residency offers to future physicians applying in workplace culture, Mentorship, opportunities, etc	0		Would love to have this lecture again	0
2	2023-10-04 20:34:22	2023-10-04 20:44:25	anonymous					M1	0		Great insight into different sub-specialties in onoclogy. Loved the short presentations from different residents/fellows	0		5	0		3	0		I really enjoyed the lectures. I think they were ver insightful and concise.	0		Keep the same/very similar lectures/format	0		Overall, I really enjoyed the format! I would not want it scrapped!	0		The science lectures felt a little longer, but I liked learning about the translational work.	0		Have another basic science/translational researcher return;Have a more clinically focused researcher return;More time for Q&A ;	0			0		I liked the multi disciplinary teams lecture, maybe a panel for this would be nice (from the different multi disciplinary fields)	0		Have the same speaker/disciplines return	0		Panel for the multi disciplinary teams!	0		It was interesting work!	0
3	2023-10-04 22:05:28	2023-10-04 22:10:41	anonymous					M2	0		Yes! I got some great networking opportunities as well as insight into various disciplines within oncology.	0		4	0		4	0		Loved it! Additionally, I would've loved to see more disciplines, such as neuro-onc, psych-onc, etc.	0		Keep the same/very similar lectures/format	0			0		I thought this was a very informative lecture	0		Have a more clinically focused researcher return;	0			0		I really enjoyed learning about these other disciplines as well! I had little knowledge about them prior	0		Have the same speaker/disciplines return	0			0		This was great and super informative!	0
4	2023-10-11 13:39:51	2023-10-11 13:56:29	anonymous					M1	0		Learned more about different careers in oncology and what the training entails	0		5	0		4	0		Really liked it, thought it was a great way to have short, helpful presentations on what the field is and how to get there. Also liked how standardized the presentations were so that each had similar content to be able to compare/contrast	0		Keep the same/very similar lectures/format	0		Maybe talk more on specific patient populations that each provider sees	0		Liked how it added a different non-clinical focus to the symposisum. Personally just not my interest but I know others who liked it	0		Have a more clinically focused researcher return;Have another basic science/translational researcher return;	0		n/a	0		Really enjoyed hearing about this perspective. Not one that is often discussed in school	0		Have the same speaker/disciplines return	0		n/a	0		Great topic but seemed a little scattered - more on personal research. Would have liked expansion to cancer prevention	0
5	2023-10-11 15:58:26	2023-10-11 16:03:31	anonymous					M2	0		Learned more about different career pathways for physicians interested in cancer.	0		3	0		4	0		This was by far the most helpful part of the day. There are a lot of different options and learning about each one individually takes time.	0		Keep the same/very similar lectures/format	0			0			0		Have a more clinically focused researcher return;	0			0			0		Have the same speaker/disciplines return	0			0		This was a very interesting lecture and not something I had thought about before.	0
6	2023-10-11 19:19:21	2023-10-11 19:31:42	anonymous					M1	0		Learning more about subspecialties in oncology, and yes I did!	0		4	0		4	0		I appreciated the variety of speakers within different fields to explain about their subspecialties and how they work with other oncologists when developing treatment plans	0		Keep the same/very similar lectures/format	0		Not sure	0		I thought it gave a great overview of subspecialties within oncology	0		Have another basic science/translational researcher return;Have a more clinically focused researcher return;	0			0		I was able to learn about collaboration between oncologists when treating cancer	0		Have the same speaker/disciplines return	0		Not sure	0		It brought up points I was not aware of prior and are important topics to discuss	0
7	2023-10-11 14:06:52	2023-10-12 20:41:54	anonymous					Graduate Student	0		Was rewarding to learn about the different aspects of clinical oncology (Not really, was hoping it would be more of trends in basic science of cancer research than clinical)	0		3	0		3	0		Was insightful	0		Change these lectures	0		Include balanced lectures on both clinical and basic cancer research	0		this was exceptionally a good one	0		Have another basic science/translational researcher return;	0			0			0			0			0			0
[truncated: 45 more columns]
