# Supplementary material for: Implementation of a Multidisciplinary Cancer Center Clinical Oncology and Research Symposium for Medical Students, Residents, Fellows and Faculty
Source: Research Square preprint supplement (doi:10.21203/rs.3.rs-6081991/v1), 2025-05-08
Supplement: Supplementary file 12 [file bbc23923897140e6cb48ae94.docx]

Hey everyone!

Thank you for attending our Annual (UNIVERSITY) Cancer Center's Careers in Clinical Oncology and Research Symposium this last weekend. Obviously the event could not be a success without your interest and willingness to come!

Please do not hesitate to reach out to staff you connected with, me or other residents/fellows as appropriate. If you do not see the emails of someone you talked with, or are having trouble connecting, let me know.

Please fill out the below form for feedback! We want to continually improve the conference, to give you and future students the best possible experience next year and beyond.

(LINK)

We have also attached the slides from the symposium, as well as emails for the staff and resident/fellows for your reference!

Thank you!
