# Supplementary material for: Implementation of a Multidisciplinary Cancer Center Clinical Oncology and Research Symposium for Medical Students, Residents, Fellows and Faculty
Source: Research Square preprint supplement (doi:10.21203/rs.3.rs-6081991/v1), 2025-05-08
Supplement: Supplementary file 13 [file c6a1ac71bdccc8a364ce2c9d.xlsx]

## Sheet: Sheet1
ID	Start time	Completion time	Email	Name	Total points	Quiz feedback	Year	Points - Year	Feedback - Year	What did you get out of this event? (Did you get what you had hoped out of this event?)	Points - What did you get out of this event? (Did you get what you had hoped out of this event?)	Feedback - What did you get out of this event? (Did you get what you had hoped out of this event?)	How likely are you to pursue a career in oncology? 1 – Very unlikely, 2 – Somewhat unlikely, 3 – Unsure, 4 – Somewhat likely, 5 – Very likely	Points - How likely are you to pursue a career in oncology? 1 – Very unlikely, 2 – Somewhat unlikely, 3 – Unsure, 4 – Somewhat likely, 5 – Very likely	Feedback - How likely are you to pursue a career in oncology? 1 – Very unlikely, 2 – Somewhat unlikely, 3 – Unsure, 4 – Somewhat likely, 5 – Very likely	How much do you feel you know about various fields in oncology? 1 – None, 2 – Below Average, 3 – Average, 4 – Above Average, 5 – A Lot	Points - How much do you feel you know about various fields in oncology? 1 – None, 2 – Below Average, 3 – Average, 4 – Above Average, 5 – A Lot	Feedback - How much do you feel you know about various fields in oncology? 1 – None, 2 – Below Average, 3 – Average, 4 – Above Average, 5 – A Lot	How did you think the "overview lectures disciplines" lectures went?	Points - How did you think the "overview lectures disciplines" lectures went?	Feedback - How did you think the "overview lectures disciplines" lectures went?	Next year should we:	Points - Next year should we:	Feedback - Next year should we:	How should we change these lectures for next year?	Points - How should we change these lectures for next year?	Feedback - How should we change these lectures for next year?	How did you think the "from bench to beside:careers in oncology lecture/Q&A panel" went?	Points - How did you think the "from bench to beside:careers in oncology lecture/Q&A panel" went?	Feedback - How did you think the "from bench to beside:careers in oncology lecture/Q&A panel" went?	Next year should we:	Points - Next year should we:	Feedback - Next year should we:	How should we change the lecture and/or Q&A section for next year?	Points - How should we change the lecture and/or Q&A section for next year?	Feedback - How should we change the lecture and/or Q&A section for next year?	How did you think the "multi disciplinary team discussion" lectures went?	Points - How did you think the "multi disciplinary team discussion" lectures went?	Feedback - How did you think the "multi disciplinary team discussion" lectures went?	Next year should we:2	Points - Next year should we:2	Feedback - Next year should we:2	How should we change this lecture series section for next year?	Feedback - How should we change this lecture series section for next year?	Points - How should we change this lecture series section for next year?	How did you think the "Diversity, community outreach and engagement" lecture went?	Feedback - How did you think the "Diversity, community outreach and engagement" lecture went?	Points - How did you think the "Diversity, community outreach and engagement" lecture went?	Next year should we:3
1	2022-10-07 16:28:32	2022-10-07 16:38:14	anonymous				M1			Yes. I hoped to hear about clinicians experiences in various oncology specialities, hear what a daily schedule was like, the best parts of working in oncology, and network/learn			5			4			Pretty well. I think maybe for the future it could be useful to give a rundown on somethjng like: this is what we do when a patient comes into clinic (questions we ask, problem solving, decision making, and how we decide on a treatment plan for a patient, etc.			Keep the same/very similar lectures/format			See #5			I don’t recall exactly what this was			Have Dr. Hall Return;Have another basic science/translational/clinical researcher return;Repeat Q&A ;						Good, but clinical trials lecture maybe was not necessary because I think people are familiar with clinical trials research (not at all to discount the great work they do!)			Have the same speaker/disciplines return			See #11			Good			Have Deb Nevels return
2	2022-10-07 16:28:26	2022-10-07 16:40:25	anonymous				M2			I expected to improve my understanding of the major physician specialties within oncology. I came out with not only that, but also with a much better understanding of adjacent fields such as genetics and clinical trials teams. It was a wonderful overview of the different disciplines.			4			4			The speakers provided a great overview of their respective disciplines.			Keep the same/very similar lectures/format			I think it would be nice to hear about the mindset one has within each field (i.e., a surgeon's approach to oncology would focus on whether something is operable and how to do it, whereas medical oncology may have to think about oncology from a different perspective on a day-to-day basis).						Have Dr. Hall Return;Repeat Q&A ;Have another basic science/translational/clinical researcher return;									Have the same speaker/disciplines return						It was an interesting talk but I don't think it fit in well with the theme of the event. Perhaps fitting it more into the theme of health disparities as a type of research focus.			Scrap/change the format of this portion
3	2022-10-07 16:39:04	2022-10-07 16:43:52	anonymous				M1			I got a lot out of the event, I learned a lot more about oncology fields and training and loved doing the cases			5			3			Good, I would have liked to have a bit more into the application process into residencies. It would be really helpful to know what I should be doing now to ensure I’m a competitive candidate.			Keep the same/very similar lectures/format			Above			Helpful to be able to ask questions			Have Dr. Hall Return;Have another basic science/translational/clinical researcher return;Repeat Q&A ;			A bit more guided Q and A could be helpful to keep convo going			Loved those!			Have the same speaker/disciplines return			Not sure			Also loved this			Have Deb Nevels return
4	2022-10-07 16:57:09	2022-10-07 17:43:18	anonymous				M2			Learned about different specialties and ate good food			3			4			Great intro			Keep the same/very similar lectures/format			They were good			Great, refreshing			Have Dr. Hall Return;			No change			Great			Have the same speaker/disciplines return			More speakers from same
5	2022-10-09 11:53:33	2022-10-09 12:00:41	anonymous				M3						4			3						Keep the same/very similar lectures/format						It went well - it would be nice to give all of the physicians a few minutes to explain their involvement, if any, in research projects			Have Dr. Hall Return;												There are genetic counseling lectures in the M2 curriculum so it may not be necessary to have them at the symposium			Very well!			Have Deb Nevels return
6	2022-10-10 10:46:16	2022-10-10 10:50:56	anonymous				M3			Learned a lot about different buckets of oncology, it was well organized, i liked the mix of didactic with small groups, no presentations were too long			5			4			I really liked these! They were short and succinct, but also provided a good context and background from which more directed questions could be asked to individual residents. Really nice that contact information was widely distributed!			Keep the same/very similar lectures/format			NA						Have Dr. Hall Return;Repeat Q&A with more time;									Have the same speaker/disciplines return									Have Deb Nevels return
7	2022-10-17 14:24:03	2022-10-17 14:29:01	anonymous				M2			I learned more about what a day-in-the-life looks like for different sub-specialists in oncology which is what I was hoping to get out of the event.			5			4			I think they went well, it was very informative.			Keep the same/very similar lectures/format						It was very interesting. A lot of it went over my head but the speaker had great things to say about work/life balance which I really appreciated.			Repeat Q&A ;Have another basic science/translational/clinical researcher return;Have Dr. Hall Return;			N/A			Yes			Have the same speaker/disciplines return			N/A			It was great!			Have Deb Nevels return
[truncated: 32 more columns]
