# Supplementary material for: Implementation of a Multidisciplinary Cancer Center Clinical Oncology and Research Symposium for Medical Students, Residents, Fellows and Faculty
Source: Research Square preprint supplement (doi:10.21203/rs.3.rs-6081991/v1), 2025-05-08
Supplement: Supplementary file 14 [file e8436bb653af93862b343646.docx]

Location/Directions: (LOCATION). (EXPLAIN HOW TO GET THERE). Public Safety will have a list of attendees to allow entrance to those who do not have a (UNIVERSITY) name badge.

Room: (ROOM) (EXPLAIN HOW TO GET THERE) The registration table will be (AREA). There will also be signage to help guide the way.

Parking: There is limited parking (LOCATION). Additional parking is available (LOCATION)

Breakfast: (PLANNED FOOD/DRINK)

Lunch: (PLANNED FOOD/DRINK)
