# Supplementary material for: Implementation of a Multidisciplinary Cancer Center Clinical Oncology and Research Symposium for Medical Students, Residents, Fellows and Faculty
Source: Research Square preprint supplement (doi:10.21203/rs.3.rs-6081991/v1), 2025-05-08
Supplement: Supplementary file 15 [file eff8b1cb25e35e04219e0373.docx]

Instagram:

Attention Medical Students – The (UNIVERSITY) Cancer Center is hosting their Annual Careers in Clinical Oncology and Cancer Research Symposium on (DATE)

The symposium creates a space for medical students to engage in hands on #learning through interactive case workshops, #networking and #mentorship opportunities, and exploring the breadth of oncologic clinical practice and #research. Attendees will also have an opportunity to connect with MCW residents and faculty.

The event will be held in the (LOCATION) starting at (TIME) and ending at (TIME). Breakfast and lunch will be provided.

Register via the link in our bio

(EXAMPLE STOCK IMAGE)


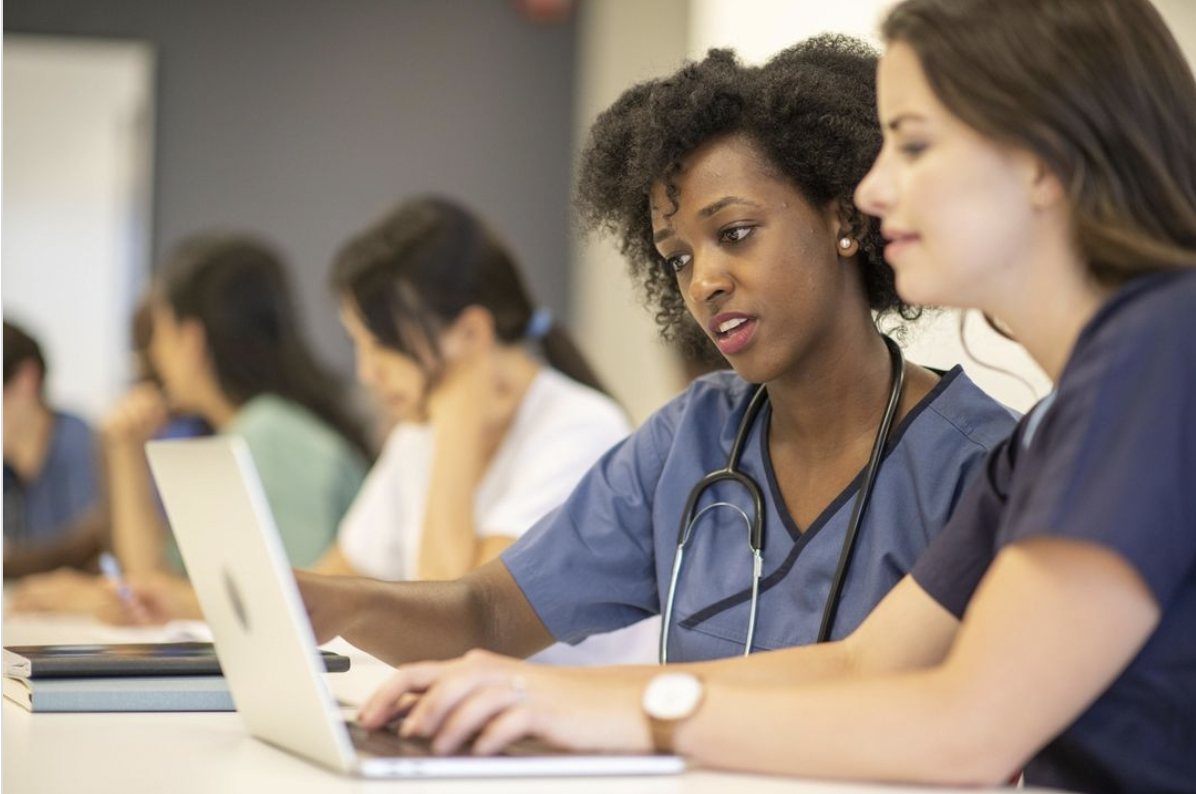


TWITTER (X):

Attention medical students - @(TWITTER HANDLE) is hosting their Annual Careers in Clinical Oncology and Cancer Research Symposium on (DATE)!

The symposium creates a space for medical students to engage in hands-on #learning through interactive case workshops, #networking and #mentorship opportunities, and exploring the breadth of oncologic clinical practice and #research. Attendees will also have an opportunity to connect with MCW residents and faculty.

The event will be held in the (LOCATION) starting at (TIME) and ending at (TIME). Breakfast and lunch will be provided.

Register here:

(LINK)

(STOCK IMAGE)
